# Supplementary material
Source: PubMed Central journal article supplement (PMC4613978)
Supplement: supp_db15-0280_DB150280SupplementaryData.pdf [file supp_db15-0280_DB150280SupplementaryData.pdf]

SUPPLEMENTARY DATA

The type-2 diabetes-associated K<sup>+</sup> channel TALK-1 modulates beta-cell electrical excitability, 2nd-phase insulin secretion, and glucose homeostasis.

Nicholas C. Vierra, Prasanna K. Dadi, Imju Jeong, Matthew Dickerson, David R. Powell, and David A. Jacobson

**Supplementary Figure S1. Generation of TALK-1 KO mice.** (A) Diagram illustrating predicted structure of *Kcnk16* (*TALK-1*) mRNA. Exons 3-5 are removed in the targeted allele. (B) Illustration of TALK-1 protein membrane topology in WT (top) mice, and the structure of the predicted truncated TALK-1 protein in TALK-1 KO mice. Note that the antibody epitope is retained in the truncated TALK-1 protein. (C) Primer pairs used to validate expression of *Kcnk16* message in WT and TALK-1 KO islets, as illustrated in panel (A). (D) Gel images of RT-PCR products obtained using primers in (C) in WT (upper image) and TALK-1 KO (lower image); note that message corresponding to exons 1-2 is expressed in TALK-1 KO islets, predicting the expression of a truncated TALK-1 protein. (E) TALK-1 transcript abundance in WT and TALK-1 KO islets, as assessed by real-time qRT-PCR; primers as in (D), expression normalized to *GAPDH*.

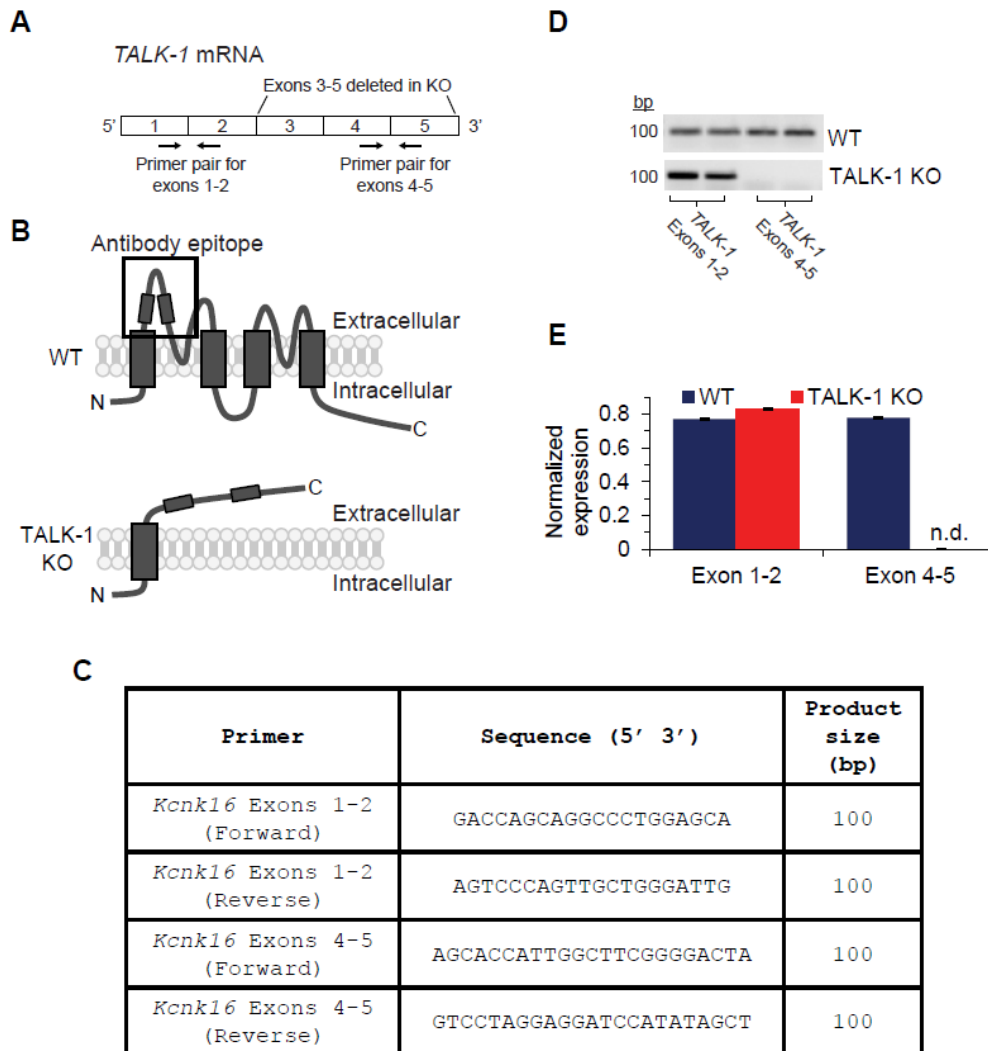

SUPPLEMENTARY DATA

**Supplementary Figure S2. The dominant negative TALK-1 G110E suppresses TALK-1 WT channel activity.** (A) Whole-cell K<sub>2</sub>P currents in HEK293 cells expressing TALK-1 and TALK-1 G110E or a control plasmid (AmCyan) in response to a voltage ramp from -120 mV to +60 mV. Current densities are quantified in (B). Data are mean values ± SEM; \*\*\**P* < 0.001; \*\*\*\**P* < 0.0001, Student's *t*-test

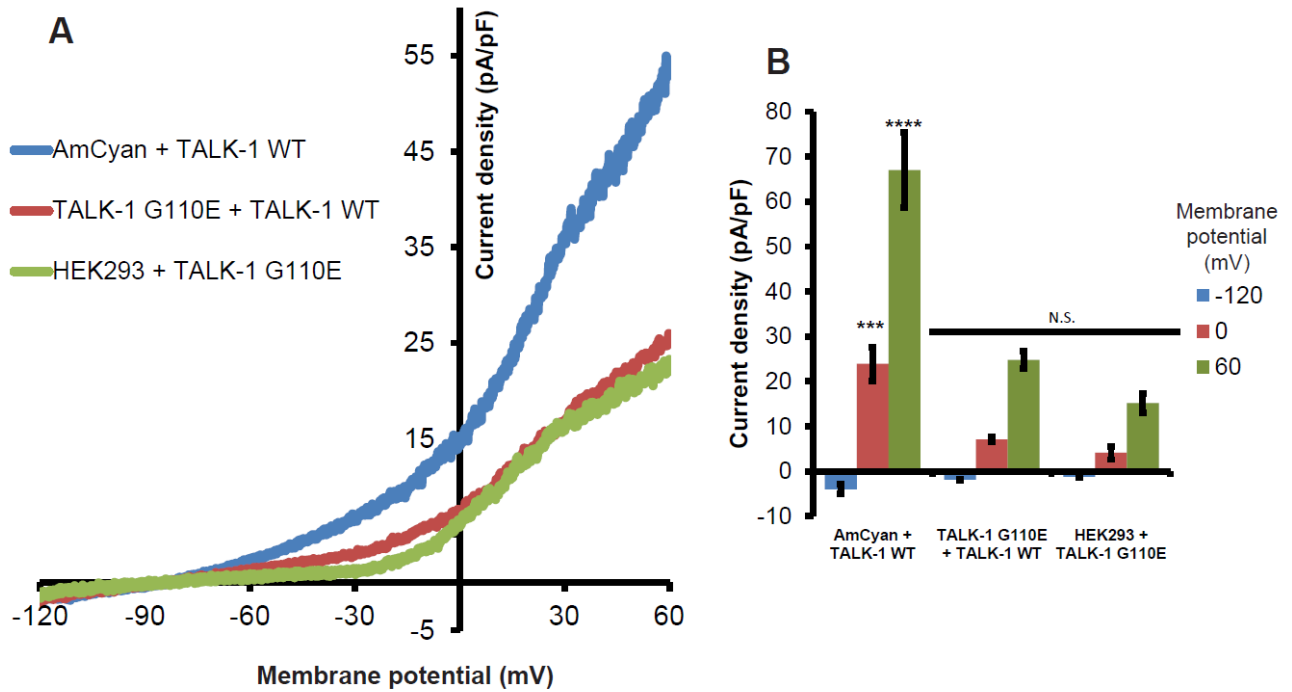

SUPPLEMENTARY DATA

**Supplementary Figure S3. TALK-1a P301H does not exhibit changes in channel activity.** Whole-cell current densities at selected membrane potentials for TALK-1a WT and TALK-1a P301H expressed in CHO cells. Data are mean values  $\pm$  SEM.

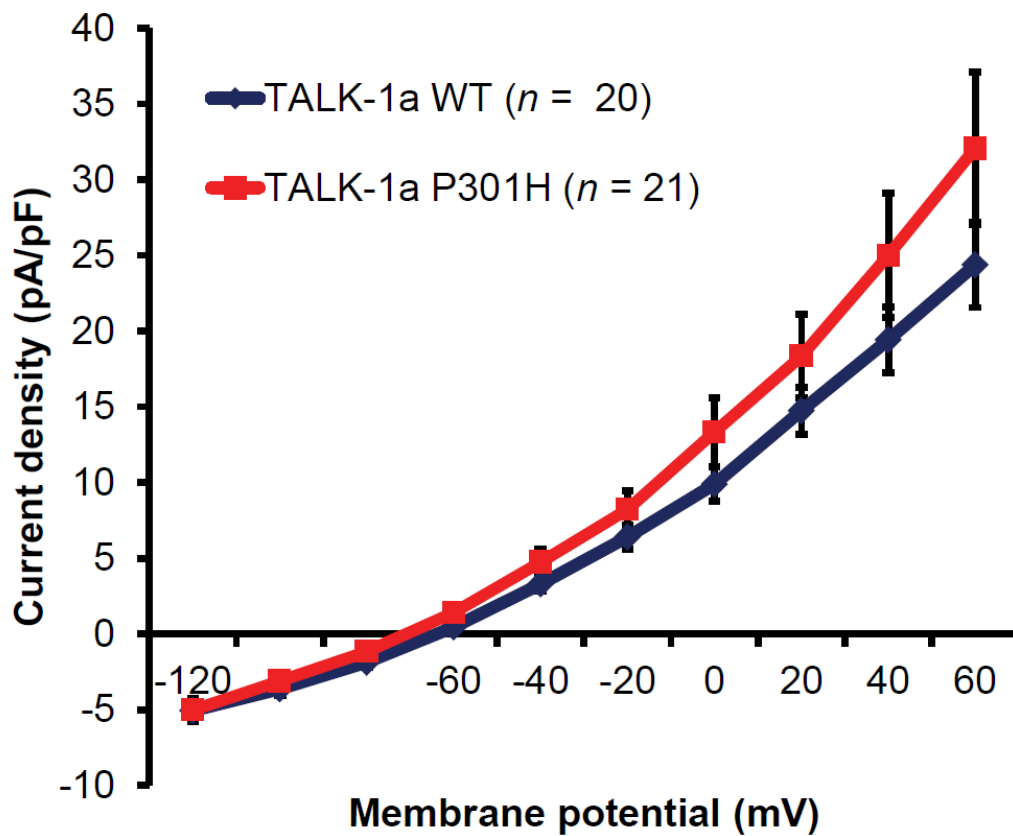

SUPPLEMENTARY DATA

**Supplementary Figure S4. Unitary currents are not different between TALK-1 WT and TALK-1 A277E.** Single channel currents measured in on-cell patches in HEK293 cells expressing TALK-1 WT or TALK-1 A277E at indicated membrane potentials.  $n \geq 5$  for each point. Data are mean values  $\pm$  SEM.

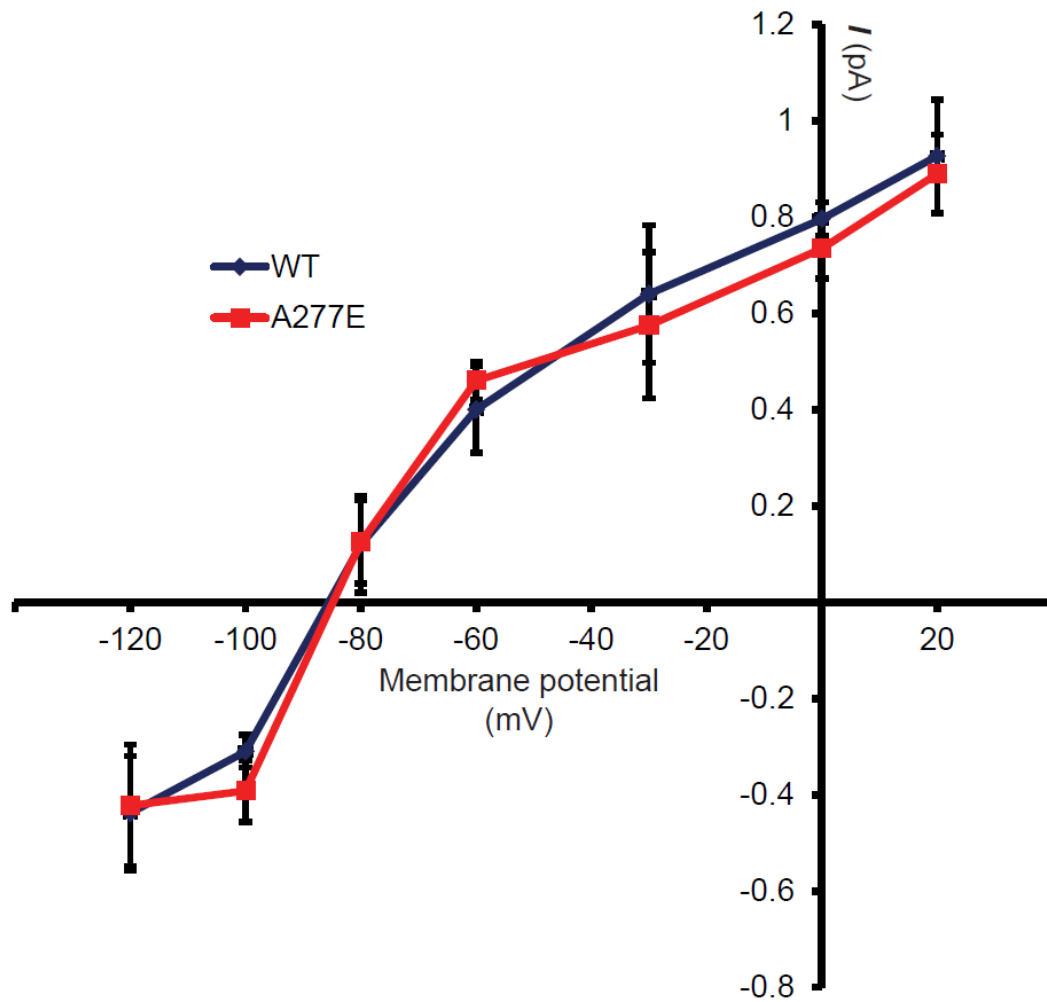

SUPPLEMENTARY DATA

**Supplementary Figure S5. Pancreas sections from TALK-1 WT and TALK-1 KO mice.** Sections were stained for insulin, as described in Research Designs and Methods.

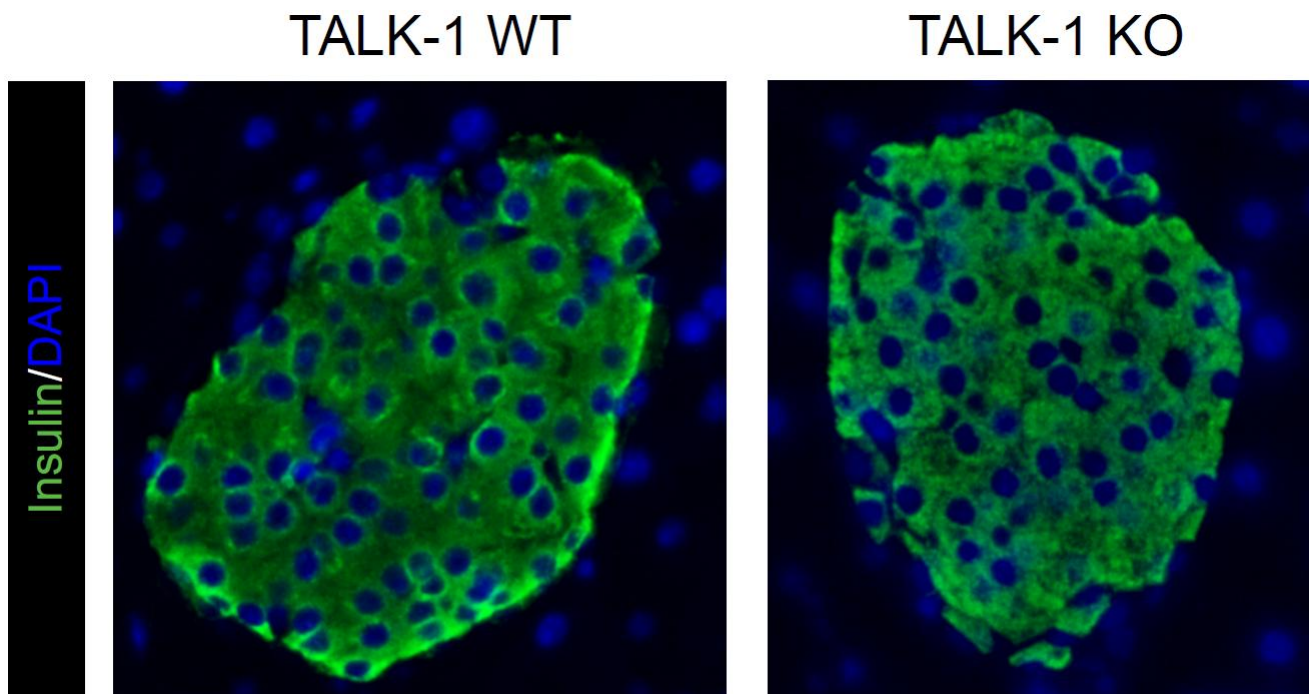

SUPPLEMENTARY DATA

**Supplementary Table S1. Action potential characteristics in WT and TALK-1 KO  $\beta$ -cells.** Action potential parameters were determined over a period of 30 seconds in the second oscillation of electrical activity in islets stimulated with 14 mM glucose using the “Threshold search” event detection function in Clampfit 10 (pCLAMP 10; Molecular Devices). Data is presented as mean  $\pm$  SD; Student’s *t*-test.

| Parameter                    | WT (n = 7)         | TALK-1 KO (n = 7)  | P value |
|------------------------------|--------------------|--------------------|---------|
| Peak amplitude (mV)          | 37.92 $\pm$ 2.24   | 30.69 $\pm$ 2.24   | 0.04    |
| Antipeak amplitude (mV)      | 22.74 $\pm$ 1.02   | 18.38 $\pm$ 1.01   | 0.009   |
| Time to peak (ms)            | 6.28 $\pm$ 0.66    | 7.91 $\pm$ 1.00    | 0.21    |
| Half-width (ms)              | 11.77 $\pm$ 1.28   | 14.71 $\pm$ 1.85   | 0.24    |
| Area (mV $\cdot$ ms)         | 395.94 $\pm$ 47.65 | 393.38 $\pm$ 44.53 | 0.96    |
| Instantaneous frequency (Hz) | 3.92 $\pm$ 0.30    | 7.93 $\pm$ 2.17    | 0.09    |
| Interevent interval (ms)     | 323.50 $\pm$ 33.59 | 351.22 $\pm$ 50.45 | 0.66    |
| Event frequency (Hz)         | 3.27 $\pm$ 0.30    | 3.17 $\pm$ 0.33    | 0.82    |
| Maximum rise slope (mV/ms)   | 4.41 $\pm$ 0.77    | 3.09 $\pm$ 0.42    | 0.14    |
| Maximum decay slope (mV/ms)  | -5.59 $\pm$ 0.90   | -3.75 $\pm$ 0.49   | 0.08    |

**Supplementary Table S2. Islet and pancreatic hormone content of WT and TALK-1 KO mice.** Islet hormone content was determined after perfusion experiments by RIA. Pancreatic insulin was extracted using acid ethanol, and quantified using a rodent insulin ELISA (ALPCO). Data is presented as mean  $\pm$  SEM; Student’s *t*-test.

| Parameter                                              | WT                             | TALK-1 KO                      | P value |
|--------------------------------------------------------|--------------------------------|--------------------------------|---------|
| Islet insulin content (ng/IEQ)                         | 37.24 $\pm$ 3.31<br>(n = 4)    | 38.87 $\pm$ 3.03<br>(n = 4)    | 0.73    |
| Islet glucagon content (pg/IEQ)                        | 912.10 $\pm$ 117.83<br>(n = 4) | 718.42 $\pm$ 106.95<br>(n = 4) | 0.27    |
| Total pancreatic insulin (Chow diet) (ng/ml/mg tissue) | 8.73 $\pm$ 3.43<br>(n = 3)     | 10.5 $\pm$ 4.89<br>(n = 3)     | 0.13    |
| Total pancreatic insulin (HFD) (ng/ml/mg tissue)       | 15.56 $\pm$ 2.05<br>(n = 4)    | 11.49 $\pm$ 1.07<br>(n = 4)    | 0.16    |

SUPPLEMENTARY DATA

**Supplementary Table S3. Islet donor characteristics for electrophysiology experiments using human islet cells.** Characteristics of human donors for islets used to examine TALK-1 currents in  $\beta$ -cells expressing control mCherry or the TALK-1 dominant negative construct.

| Donor           | 1         | 2         |
|-----------------|-----------|-----------|
| Sex             | F         | M         |
| Age             | 32 yrs    | 52 yrs    |
| BMI             | 39.4      | 22.5      |
| Ethnicity       | Caucasian | Caucasian |
| Type 2 Diabetes | No        | No        |

**Supplementary Table S4. Human pancreas donor characteristics for immunofluorescence**

| Donor           | 1                | 2         |
|-----------------|------------------|-----------|
| Sex             | M                | M         |
| Age             | 31 yrs           | 58 yrs    |
| Ethnicity       | African American | Caucasian |
| Type 2 Diabetes | No               | No        |
